# Supplementary material for: Synthesis of core–shell Ce-modified mixed metal oxides derived from P123-templated layered double hydroxides
Source: Royal Society of Chemistry journal article supplement (doi:10.1039/d1ra00227a), 2021-01-01
Supplement: d1ra00227a1.pdf [file d1ra00227a1.pdf]

## Supplementary Information

### Synthesis of Core-Shell Ce-modified Mixed Metal Oxides Derived from P123-Templated Layered Double Hydroxides

Kaijun Wang,<sup>a</sup> Qifan Mao,<sup>a</sup> Weimin Fei,<sup>a</sup> Lingxin Kong,<sup>a</sup> Xiaoyan Cao,<sup>a</sup> and Zhenggui Gu<sup>\*a</sup>

<sup>a</sup> Jiangsu Provincial Key Laboratory of Materials Cycling and Pollution Control, Nanjing Normal University, Nanjing, Jiangsu 210023 China.

\*Corresponding authors: Zhenggui Gu

Email:07160@njnu.edu.cn

#### Supporting Figures

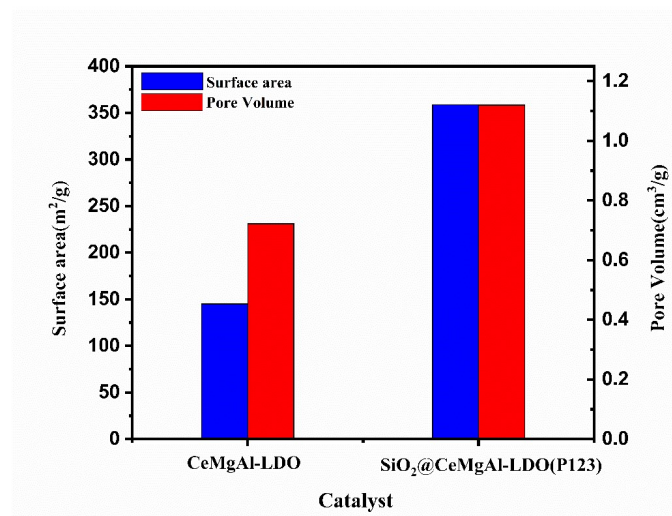

Figure S1 Surface area and Pore Volume of samples.

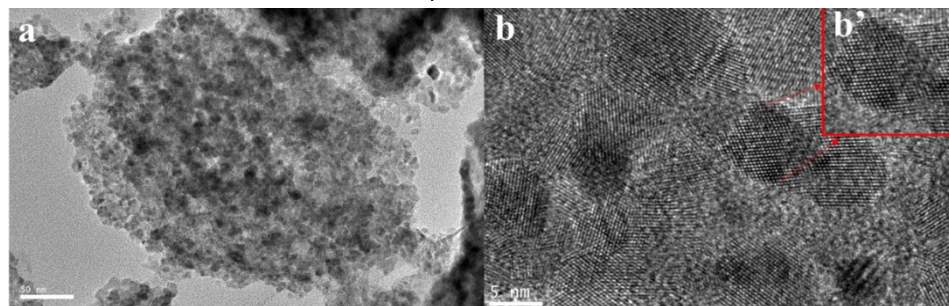

Figure S2 TEM images of Ce<sub>1</sub>Mg<sub>3</sub>Al<sub>1</sub>-LDO.

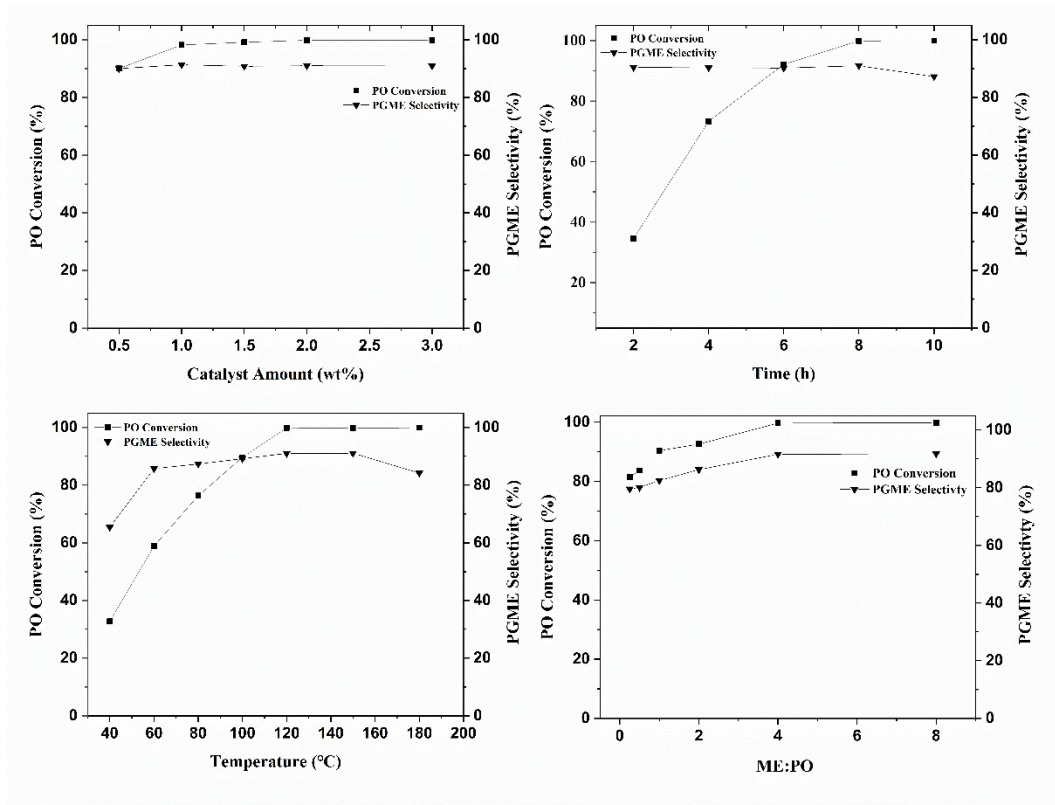

Figure S3 Single factor optimization of the reaction.
